# Supplementary material
Source: PubMed Central journal article supplement (PMC6101210)
Supplement: NIHMS79050-supplement-Supplementary_Figures_and_Legends.pdf [file NIHMS79050-supplement-Supplementary_Figures_and_Legends.pdf]

## SUPPLEMENTAL FIGURE LEGENDS

**Figure S1. *Acot7* expression remains unchanged in hypothalamus and liver of *Acot7* Tg mice and the expression of other members of the family is identical in *Acot7* transgenic islets than control. A,B)** RT-qPCR expression data of *Acot7* mRNA in hypothalamus, liver and isolated islets from *Acot7* Tg (line F26) (green) and littermate controls (black). Data (mean  $\pm$  S.E.M) is presented as fold change *versus* control (A) or relative to actin (B). n=4-5 mice/genotype (each dot represents an individual mouse). **C)** RT-qPCR was used to evaluate the expression of the indicated *Acot* family members. n=4 mice/genotype. Data (mean  $\pm$  S.E.M) presented as fold change *versus* control.

**Figure S2. *Acot7* over-expression does not affect body weight or randomly-fed glycemia.** Body weight (left hand panels) and randomly-fed glycaemia (right hand panels) were periodically monitored in *Acot7* Tg mice (Line F26; green lines) and littermate controls (black lines) following the beginning of the Doxycycline treatment (5 weeks old). n=8-10. ns: non-significant. Student t-test corrected for multiple comparisons by the Sidak-Bonferroni method.

**Figure S3.  $\beta$ -cell-selective over-expression of mitochondrial *Acot7* impairs glucose tolerance (Lines F15 and F9). A)** Glucose tolerance was measured in 25 week old female mice from *Acot7* Tg lines F15 (left) or F9 (right) fed a regular chow diet. **B)** Glucose tolerance was measured in 9 week old male mice from *Acot7* Tg lines F15 (left) or F9 (right) fed a high fat diet during 4 weeks. *Acot7* Tg are shown in green and littermate controls in black. The area under the curve (AUC) is shown underneath each graph. n=5-8 mice/genotype. ns: non-significant, \*p<0.05, \*\*p<0.01; Two-way ANOVA Fisher least significance different test (Glucose tolerance test); Student's t test (AUC).

**Figure S4. Over-expression of *Acot7* does not affect insulin resistance and  $\beta$ -cell mass. A)** Insulin tolerance was measured in 9 week-old females *Acot7* Tg (green) or littermate control (black) mice (line F26) fed a high-fat diet (left panel) and 25 week-old females *Acot7* Tg (green) or control (black) (line F15) fed a chow diet (right hand-side graph). n=5-6 mice/genotype (left), 3-4 (right). **B, C)** Pancreata from *Acot7* Tg (F26) and littermate control mice fed a normal diet ((B), 25 week-old) or a high-fat diet ((C), 9 week-old), as indicated were fixed and subjected to immunocytochemical analysis for insulin and glucagon, as indicated. Representative islets are shown on the left. Scale bar: 50 $\mu$ m. ImageJ software was used to quantify  $\beta$ -cell mass which is presented as a percentage of the pancreatic surface and corresponds to quantification of the insulin-positive area per pancreas area quantified in whole pancreas sections. n=6 mice/genotype (3 male,3 female

each); 2 pancreas sections per animal were used, separated by 50µm. ns: non-significant; Unpaired Student's t test.

**Figure S5. The expression of genes essential for GSIS remained unchanged upon ACOT7 over-expression in islets.** RT-qPCR was used to evaluate the expression of the indicated genes in isolated islets from Acot7 Tg (F26) (green) and littermate controls (black). Data (mean ± S.E.M) presented as fold change *versus* control. n=4 mice/genotype.

**Figure S6. A The expression of *Ldha* and *Slc16a1* remained unchanged upon ACOT7 over-expression in islets.** RT-qPCR was used to evaluate the expression of *Ldha* and *Slc16a1* in isolated islets from Acot7 Tg (F15 and F26, as indicated) (green) and littermate controls (black). Data (mean ± S.E.M) presented as fold change *versus* control. n=8-10 mice/genotype. **B Overexpression of *Acot7* in INS1 (832/13) cells impairs leucine plus glutamine-induced insulin secretion. Leucine plus glutamine-stimulated insulin secretion was evaluated in INS1(832/13) cells over-expressing mitochondrial *Acot7* (*Acot7*) or an empty vector (C). Insulin secretion was measured after a 30min. stimulation at 3mM glucose (G: Glucose) alone or in the presence of 10mM leucine (Leu) and 10mM glutamine (Gln). Data are from four independent experiments and eight technical replicates (means ± S.E.M). \*p<0.05. Matched two-way ANOVA, Bonferroni test. The experiments were performed 24h after cell transfection and the cells were pre-incubated at 3mM glucose during 1h before starting the experiments.**

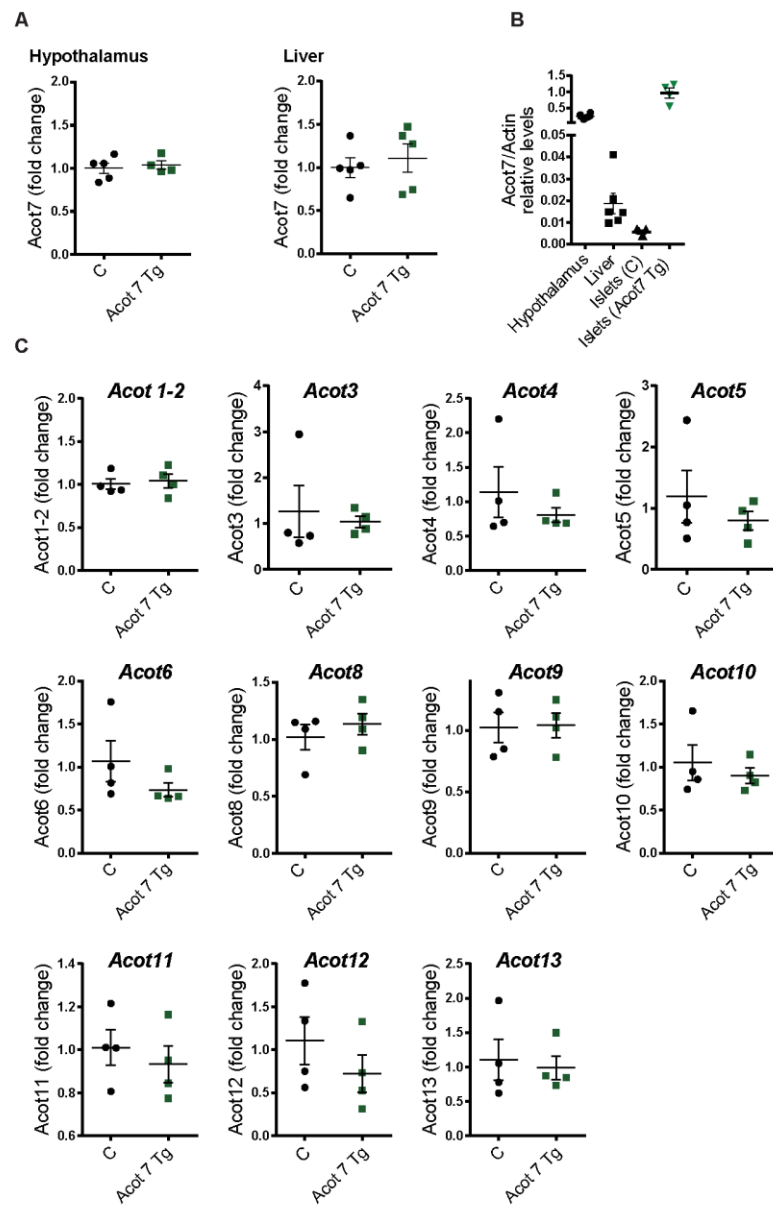

Figure S1.

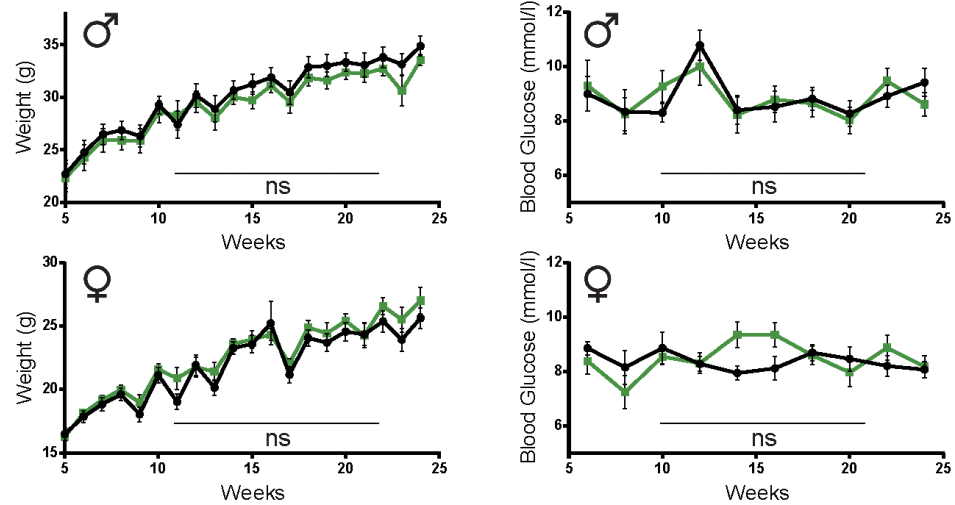

Figure S2.

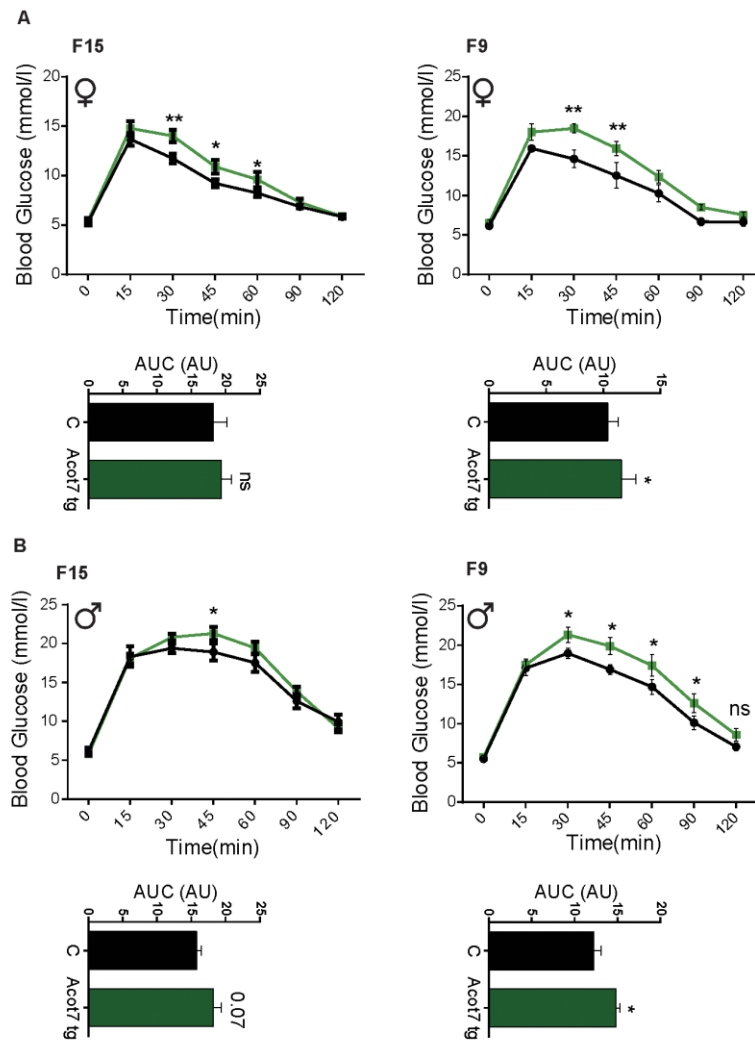

**Figure S3.**

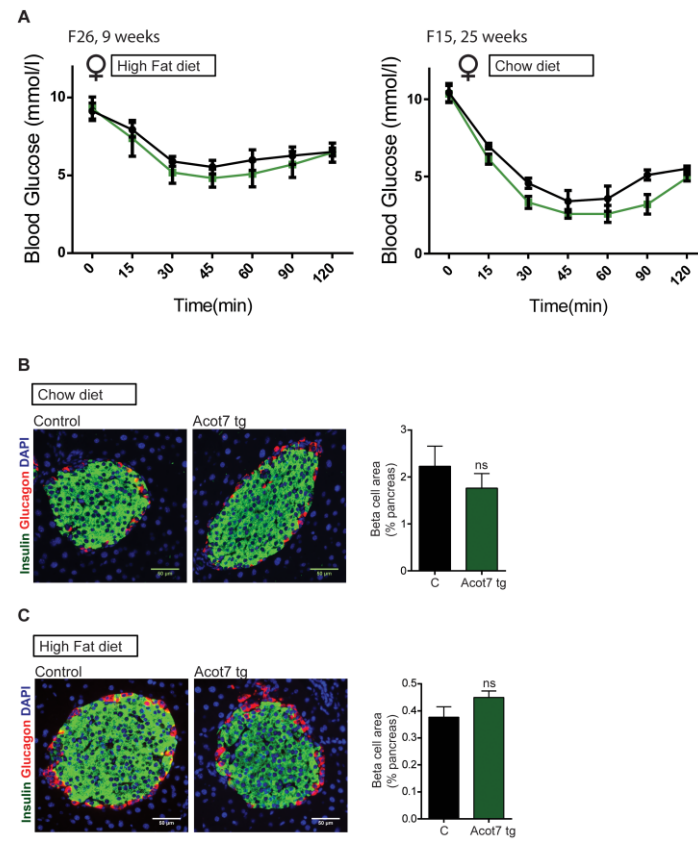

Figure S4.

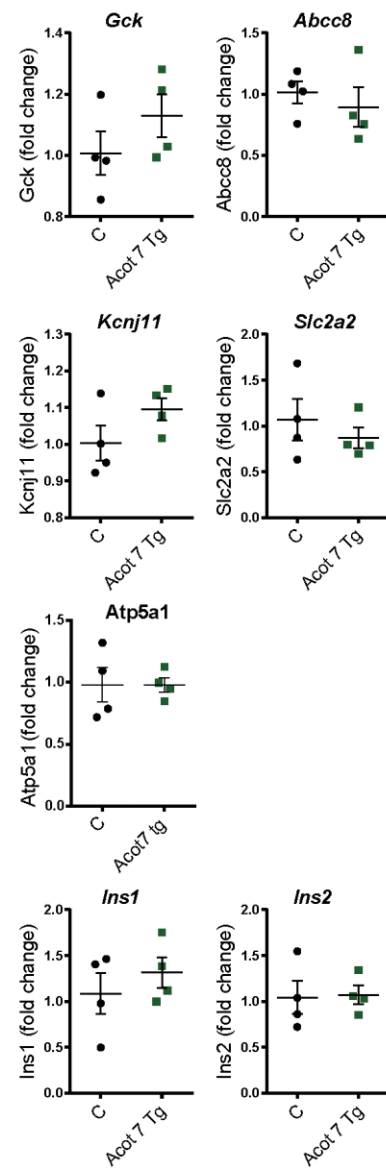

Figure S5.
